# Supplementary material
Source: PubMed Central journal article supplement (PMC6764013)

## Supplementary Online Content

Adelantado-Renau M, Moliner-Urdiales D, Cavero-Redondo I, Beltran-Valls MR, Martínez-Vizcaíno V, Álvarez-Bueno C. Association between screen media use and academic performance among children and adolescents: a systematic review and meta-analysis. *JAMA Pediatr*. Published online September 23, 2019. doi:10.1001/jamapediatrics.2019.3176

**eTable 1.** Summary of Characteristics of Included Cross-Sectional Studies

**eTable 2.** Data from Included Studies Examining the Linear Associations or Mean Differences Between Duration of Screen-based Activities and Academic Performance in Children and Adolescents

**eTable 3.** Study Quality Assessed by the Quality Assessment Tool for Observational Cohort and Cross-Sectional Studies

**eTable 4.** Random-Effects Meta-Regression Model to Examine Whether the Associations Between Screen-based Activities and Composite Scores Are Associated With the Children's and Adolescents' Age (in Years)

**eTable 5.** Sensitivity Analysis by Removing the Studies One by One

**eFigure.** Funnel Plots Assessing Publication Bias for Studies Analysing the Association of A) Overall Screen Media, B) Television Viewing, and C) Video Games Playing, With Academic Performance Areas

This supplementary material has been provided by the authors to give readers additional information about their work.

**eTable 1.** Summary of Characteristics of Included Cross-Sectional Studies

| Author                                | Year | Country         | N (% Girls) | Mean age (y)              | Measure of screen media | Measure of academic performance                                                                                                                                              | Confounders                                                     |
|---------------------------------------|------|-----------------|-------------|---------------------------|-------------------------|------------------------------------------------------------------------------------------------------------------------------------------------------------------------------|-----------------------------------------------------------------|
| Adelantado-Renau et al <sup>25</sup>  | 2019 | Spain           | 269 (48)    | 13.9 ± 0.3                | Internet, MP, TV, VG    | School grades:<br>- Mathematics<br>- Language<br>- Overall of mathematics and language<br>- GPA<br>SRA Test of Educational Ability:<br>- Numeric ability<br>- Verbal ability | Sex and pubertal status                                         |
| Busch et al <sup>26</sup>             | 2017 | The Netherlands | 905 (58.7)  | 13.9 ± 1.50               | Internet, TV, VG        | School grades:<br>- GPA                                                                                                                                                      | Psychosocial problems                                           |
| Caldas and Bankston <sup>27</sup>     | 1999 | US              | 42041       | 10 <sup>th</sup> grade    | TV                      | Louisiana Graduation Exit Examination:<br>- GPA                                                                                                                              | Racial composition of school, family SES, and female structure. |
| Clarke and Kurtz-Costes <sup>28</sup> | 1997 | US              | 30 (50)     | 4.75 ± 0.5                | TV                      | Metropolitan Readiness Test:<br>- Reading                                                                                                                                    | Age and IQ                                                      |
| Cooper et al <sup>29</sup>            | 1999 | US              | 424 (53)    | 6-12 <sup>th</sup> grades | TV                      | Comprehensive Test of Basic Skills (CTBS/4):<br>- Overall of mathematics and language<br>Teacher-assigned grades:<br>- GPA                                                   | Academic achievement (CTBS/4)                                   |

|                                     |      |                   |              |                       |                  |                                                                                                                                           |                                                                                                                             |
|-------------------------------------|------|-------------------|--------------|-----------------------|------------------|-------------------------------------------------------------------------------------------------------------------------------------------|-----------------------------------------------------------------------------------------------------------------------------|
| Dumuid et al <sup>30</sup>          | 2017 | Australia         | 284 (53.9)   | 9-11                  | Screen media     | National Assessment Program—Literacy and Numeracy:<br>- Numeracy<br>- Grammar<br>- Reading<br>- Spelling<br>- Writing<br>- Overall        | BMI, parental education, sex, mother's weekly employment hours, and number of parents and siblings.                         |
| Drummond and Sauer <sup>12</sup>    | 2014 | 22 OECD countries | 192000       | 15                    | VG               | Standardized academic achievement tests (i.e., PISA):<br>- Mathematics<br>- Reading<br>- Science                                          | School site and country                                                                                                     |
| Esteban-Cornejo et al <sup>31</sup> | 2015 | Spain             | 1146 (49.2)  | 12.5 ± 2.5            | Internet, TV, VG | School grades:<br>- Language<br>- Mathematics<br>- Overall of mathematics and language<br>- GPA                                           | Sex, age, city, maternal education, birth weight, gestational age, BMI, fitness and moderate-to-vigorous physical activity. |
| Faught et al <sup>32</sup>          | 2017 | Canada            | 28608 (50.9) | 11-15                 | Screen media     | Self-reported academic achievement:<br>- GPA                                                                                              | Age, sex, SES, physical activity, diet, sleep and BMI.                                                                      |
| Ferguson <sup>33</sup>              | 2011 | US                | 603 (48.8)   | 12.35 ± 1.34          | TV, VG           | Self-reported academic achievement by parents:<br>- GPA                                                                                   | Sex, number of children and family income, depression and anxiety, psychological aggression and negative life events.       |
| Fetler <sup>34</sup>                | 1984 | US                | 10603        | 6 <sup>th</sup> grade | TV               | Survey of Basic Skills:<br>- Mathematics<br>- Reading<br>- Written expression<br>- Overall of mathematics, reading and written expression | Parents' occupation and home environment.                                                                                   |

|                                         |      |          |              |                                |                            |                                                                                                                                |                                                       |
|-----------------------------------------|------|----------|--------------|--------------------------------|----------------------------|--------------------------------------------------------------------------------------------------------------------------------|-------------------------------------------------------|
| García-Hermoso and Marina <sup>35</sup> | 2017 | Chile    | 395 (49.6)   | B: 12.2 ± 0.6<br>G: 12.2 ± 0.7 | Screen media               | School grades:<br>- Mathematics<br>- Language<br>- Overall of mathematics and language                                         | Maternal education, SES and neonatal characteristics. |
| Hastings et al <sup>36</sup>            | 2009 | US       | 70 (50)      | 7.8 ± 1.2                      | TV, VG                     | School grades:<br>- GPA                                                                                                        | NA                                                    |
| Hartanto et al <sup>37</sup>            | 2018 | US       | 8971 (50.2)  | 14                             | VG                         | National standardized assessment:<br>- Mathematics<br>- Reading<br>- Science                                                   | Sex, race, SES, home language, and family composition |
|                                         |      | US       | 13979 (50.8) | 16                             | VG                         | National standardized assessment:<br>- Mathematics<br>- Reading                                                                |                                                       |
|                                         |      | US       | 8064 (52.2)  | 18                             | VG                         | National standardized assessment:<br>- Mathematics<br>- Reading<br>- Science                                                   |                                                       |
| Inal et al <sup>38</sup>                | 2012 | Turkey   | 804 (49.5)   | 16.13 ± 0.88                   | Internet                   | Academic achievement survey ad hoc:<br>- GPA                                                                                   | NA                                                    |
| Jackson et al <sup>39</sup>             | 2008 | US       | 515 (54.4)   | 12.8                           | Computer, internet, MP, VG | School grades:<br>- GPA                                                                                                        | NA                                                    |
| Jackson et al <sup>40</sup>             | 2011 | US       | 482 (52.9)   | 12.19 ± 0.72                   | Internet, MP, VG           | School grades:<br>- GPA<br>Self-reported school grades:<br>- GPA<br>Wide Range Achievement Test:<br>- Mathematics<br>- Reading | Sex, race, age and income.                            |
| Jaruratanasirikul et al <sup>41</sup>   | 2009 | Thailand | 1492         | 15.9 ± 1.1                     | VG                         | Questionnaire designed ad hoc:<br>- GPA                                                                                        | NA                                                    |

|                                                    |      |                                                                                   |                 |          |                                                       |                                                                                                                                                                            |                                                                                                                                                                                                                                                  |
|----------------------------------------------------|------|-----------------------------------------------------------------------------------|-----------------|----------|-------------------------------------------------------|----------------------------------------------------------------------------------------------------------------------------------------------------------------------------|--------------------------------------------------------------------------------------------------------------------------------------------------------------------------------------------------------------------------------------------------|
| Jeong and Kim <sup>42</sup>                        | 2011 | Korea                                                                             | 600 (62.3)      | 12-18    | VG                                                    | School grades:<br>- GPA                                                                                                                                                    | NA                                                                                                                                                                                                                                               |
| Keith et al <sup>43</sup>                          | 1986 | US                                                                                | 28051           | NA       | TV                                                    | HSB Reading,<br>Mathematics I, and Mathematics II<br>standardized tests:<br>- Overall measure                                                                              | Ethnicity, family background, gender,<br>intellectual ability, parental<br>involvement and homework.                                                                                                                                             |
| Kiatrungrit and<br>Hongsanguansri<br><sup>44</sup> | 2014 | Thailand                                                                          | 768 (57.7)      | 15.4±1.5 | Computer, MP,<br>TV, VG, Screen<br>media              | School grades:<br>- GPA                                                                                                                                                    | NA                                                                                                                                                                                                                                               |
| Kim et al <sup>45</sup>                            | 2017 | Korea                                                                             | 59105<br>(48.3) | 12-18    | Internet (for<br>study and for<br>general<br>purpose) | Self-reported school grades:<br>- GPA                                                                                                                                      | Age, sex, obesity, region of<br>residence, income level, education<br>level of father, education level of<br>mother, stress level, sleep time, days<br>of physical activity, smoking, alcohol<br>consumption, drug use, and total<br>study time. |
| Kovacs et al <sup>46</sup>                         | 2008 | Spain                                                                             | 7048 (50.9)     | 13-15    | TV                                                    | Academic failure                                                                                                                                                           | NA                                                                                                                                                                                                                                               |
| Kovess-Masfety<br>et al <sup>47</sup>              | 2016 | Germany, The<br>Netherlands,<br>Lithuania,<br>Romania,<br>Bulgaria, and<br>Turkey | 3195 (36.6)     | 6-11     | VG                                                    | Teacher self-reported academic<br>performance<br>- GPA                                                                                                                     | Sex, age, the number of children in<br>household, region (Eastern vs<br>Western Europe), mother's age,<br>SES, marital status, and mother's<br>psychological distress.                                                                           |
| Kristjánsson et<br>al <sup>48</sup>                | 2009 | Iceland                                                                           | 5810 (51.7)     | 14-15    | TV                                                    | School grades:<br>- Mathematics<br>- Icelandic<br>- English or Swedish<br>- Danish or Norwegian<br>- Overall of mathematics, English or<br>Swedish and Danish or Norwegian | Gender, parental education, family<br>structure and depressive symptoms.                                                                                                                                                                         |

|                                    |      |          |             |                                         |              |                                                                                                             |                                                                                                                                                                                                                                     |
|------------------------------------|------|----------|-------------|-----------------------------------------|--------------|-------------------------------------------------------------------------------------------------------------|-------------------------------------------------------------------------------------------------------------------------------------------------------------------------------------------------------------------------------------|
| Kureishi and Yoshida <sup>49</sup> | 2013 | Japan    | 422         | 5-6 <sup>th</sup> grades                | TV           | Mother self-reported academic performance<br>- GPA                                                          | Sex, grade, sibling composition, types of school, mother's employment status, father's workplace, educational attainment of parents, father's age, parental asset, income and population of each prefecture where the family lives. |
| Leng et al <sup>50</sup>           | 2009 | Malaysia | 236 (51.5)  | 13-14                                   | VG           | Primary School Assessment Test or Ujian Penilaian Sekolah Rendah:<br>- GPA                                  | NA                                                                                                                                                                                                                                  |
| Malhi et al <sup>51</sup>          | 2016 | India    | 362 (49.4)  | 14-18                                   | Computer, TV | Woodcock-Johnson III Tests of Achievement:<br>- Mathematics<br>- Reading<br>- Spelling<br>- Writing fluency | NA                                                                                                                                                                                                                                  |
| Martínez-Gómez et al <sup>52</sup> | 2012 | Spain    | 1825 (52.9) | 13-18                                   | TV           | School grades:<br>- Mathematics<br>- Language<br>- Overall of mathematics and language                      | BMI, family structure, school attitude, who had to repeat a year in school, and skipping classes.                                                                                                                                   |
| Morita et al <sup>8</sup>          | 2016 | Japan    | 315 (48.3)  | 12-13                                   | Screen media | School grades:<br>- GPA                                                                                     | Household income, mother's education, utilization of a cram school/private teacher, obesity status and physical fitness.                                                                                                            |
| Muñoz-Miralles et al <sup>53</sup> | 2014 | Spain    | 5538        | 12-16                                   | Computer, VG | Academic failure                                                                                            | NA                                                                                                                                                                                                                                  |
| Özmert et al <sup>10</sup>         | 2002 | Turkey   | 689 (50.2)  | 2 <sup>nd</sup> -3 <sup>rd</sup> grades | TV           | Child Behavior Checklist:<br>- School achievement                                                           | Gender and SES.                                                                                                                                                                                                                     |

|                                     |      |          |            |                                         |                                    |                                                                                                                                                                                    |                                                                                                                                                                    |
|-------------------------------------|------|----------|------------|-----------------------------------------|------------------------------------|------------------------------------------------------------------------------------------------------------------------------------------------------------------------------------|--------------------------------------------------------------------------------------------------------------------------------------------------------------------|
| Özmert et al <sup>54</sup>          | 2011 | Turkey   | 860 (51.2) | 7-8 <sup>th</sup> grades                | TV                                 | Child Behavior Checklist:<br>- School achievement                                                                                                                                  | Gender, SES, age, having TV in bedroom, maternal education, paternal education, aggressive behaviour, delinquent behaviour, sex problem and social problem scores. |
| Peirce <sup>55</sup>                | 1983 | US       | 102        | 5-8 <sup>th</sup> grades                | TV                                 | Test based on guidelines provided by the National Assessment of Educational Progress:<br>- Writing                                                                                 | Books, parent interest and education.                                                                                                                              |
| Peiró-Velert et al <sup>56</sup>    | 2014 | Spain    | 3095       | 12-18                                   | Computer use, MP, VG, Screen media | Failed subjects index                                                                                                                                                              | Gender and SES.                                                                                                                                                    |
| Potter <sup>57</sup>                | 1987 | US       | 543 (50.3) | 8-12 <sup>th</sup> grades               | TV                                 | McGraw-Hill Comprehensive Test of Basic Skills, Version U:<br>- Math<br>- Language<br>- Reading<br>- Science<br>- Social studies<br>- Overall of mathematics, language and reading | Intelligence Quotient                                                                                                                                              |
| Poulain et al <sup>58</sup>         | 2018 | Germany  | 850 (48.8) | 13.01                                   | Internet, MP, TV, VG, Screen media | School grades:<br>- Mathematics<br>- Language<br>- Physical Education                                                                                                              | Age, gender, SES, year of data assessment, and BMI.                                                                                                                |
| Regondola and Barbado <sup>13</sup> | 2017 | Filipins | 127 (53.5) | 2 <sup>nd</sup> -6 <sup>th</sup> grades | TV, VG, Screen media               | School grades:<br>- GPA                                                                                                                                                            | NA                                                                                                                                                                 |

|                                                |      |        |             |                           |          |                                                                                                                                      |                                                                                                                                                  |
|------------------------------------------------|------|--------|-------------|---------------------------|----------|--------------------------------------------------------------------------------------------------------------------------------------|--------------------------------------------------------------------------------------------------------------------------------------------------|
| Ribner et al <sup>59</sup>                     | 2017 | Canada | 807 (50.2)  | 5.74 ± 0.34               | TV       | Woodcock-Johnson III Tests of Achievement:<br>- applied problems subtest<br>- letter-word subtest                                    | Age and sex                                                                                                                                      |
| Ridley-Johnson et al <sup>60</sup>             | 1983 | US     | 322         | 5-8 <sup>th</sup> grades  | TV       | School grades:<br>- Mathematics<br>- Reading                                                                                         | NA                                                                                                                                               |
| Sánchez-Martínez and Otero Puime <sup>61</sup> | 2010 | Spain  | 1328 (53.7) | 15                        | Internet | Academic failure                                                                                                                     | NA                                                                                                                                               |
| Scott <sup>62</sup>                            | 1958 | US     | 456         | 6-7 <sup>th</sup> grades  | TV       | School grades:<br>- Arithmetic<br>- Reading<br>- Language<br>- Spelling                                                              | Age and intelligence quotient.                                                                                                                   |
| Sharif and Sargent <sup>63</sup>               | 2006 | US     | 4508 (51)   | 5-8 <sup>th</sup> grades  | TV, VG   | Self-reported school performance:<br>- GPA                                                                                           | Parenting style, child personality, demographics, and school.                                                                                    |
| Sharma et al <sup>64</sup>                     | 2017 | Peru   | 1234 (61.4) | 11-19                     | TV       | Self-reported school performance:<br>- GPA                                                                                           | Sex, age group, physical activity, school and grade.                                                                                             |
| Shashi Kumar et al <sup>65</sup>               | 2013 | India  | 586 (39.07) | 9-12 <sup>th</sup> grades | TV       | Questionnaire designed ad hoc:<br>- GPA                                                                                              | NA                                                                                                                                               |
| Shejwal and Purayidathil <sup>66</sup>         | 2006 | India  | 654 (43.7)  | 16.05 ± 0.85              | TV       | School grades:<br>- GPA<br>Test of Cognitive Processes (Oad and Misra, 1999):<br>- Mathematics                                       | NA                                                                                                                                               |
| Shin <sup>67</sup>                             | 2004 | US     | 1203 (49.7) | 6-13                      | TV       | Woodcock-Johnson III Tests of Achievement:<br>- Applied problem<br>- Calculation<br>- Letter-word subtest<br>- Passage comprehension | Homework and studying, reading for leisure, impulsive behaviours and academic achievement (other subtests different from the studied dimension). |



|                                     |      |                 |              |                          |              |                                                           |                                                                                                                                                                     |
|-------------------------------------|------|-----------------|--------------|--------------------------|--------------|-----------------------------------------------------------|---------------------------------------------------------------------------------------------------------------------------------------------------------------------|
| Skoric et al <sup>11</sup>          | 2009 | Singapore       | 333 (46.0)   | 10 ± 1.08                | VG           | School grades:<br>- English<br>- Mathematics<br>- Science | Race, gender, video game addiction and engagement tendencies.                                                                                                       |
| Syväoja et al <sup>9</sup>          | 2013 | Finland         | 277 (55.6)   | 12.2 ± 0.6               | Screen media | School grades:<br>- GPA                                   | The mother and father's education, family income, marital status, and children's learning difficulties.                                                             |
| Syväoja et al <sup>68</sup>         | 2018 | Finland         | 970 (52.3)   | 12.5 ± 1.3               | Screen media | School grades:<br>- GPA                                   | Learning difficulties, and mother's education.                                                                                                                      |
| Trinh et al <sup>69</sup>           | 2015 | Canada          | 2660 (52.5)  | 15.8 ± 1.30              | TV           | Self-reported school performance:<br>- GPA                | Grade, years of highest parental education, BMI, type of living and physical activity.                                                                              |
| Van Schie and Wiegman <sup>70</sup> | 1997 | The Netherlands | 346 (50.6)   | 7-8 <sup>th</sup> grades | VG           | School grades:<br>- Arithmetic<br>- Language<br>- GPA     | NA                                                                                                                                                                  |
| Vassiloudis et al <sup>71</sup>     | 2014 | Greece          | 528 (51.5)   | 10-12                    | TV           | School grades:<br>- GPA                                   | SES, adherence to the Mediterranean diet, BMI, sleep duration, physical activity, self-esteem, mother and father's education, mother's ethnicity and family income. |
| Walberg and Weinstein <sup>72</sup> | 1982 | US              | 2001 (51.5)  | 17                       | TV           | Social studies test:<br>- GPA                             | Attitude, stimulation, extracurricular activities, class, homework, gender and race.                                                                                |
| Walberg and Tsai <sup>73</sup>      | 1984 | US              | 2912 (50)    | 18                       | TV           | Booklet 15 test:<br>- Reading                             | NA                                                                                                                                                                  |
| Wang et al <sup>74</sup>            | 2018 | China           | 23543 (49.7) | 15.6                     | Screen media | Self-reported school performance:<br>- GPA                | Sociodemographic and health-related behavioural factors.                                                                                                            |

|                                                                                                                                                                                                                          |      |       |             |             |        |                                       |                                                                                                                  |
|--------------------------------------------------------------------------------------------------------------------------------------------------------------------------------------------------------------------------|------|-------|-------------|-------------|--------|---------------------------------------|------------------------------------------------------------------------------------------------------------------|
| Welch et al <sup>75</sup>                                                                                                                                                                                                | 1986 | US    | 1960 (50)   | 9           | TV     | Achievement test:<br>- GPA            | Ability, motivation, quality and quantity of instruction, homework, class and home environment, gender and race. |
| Yan et al <sup>76</sup>                                                                                                                                                                                                  | 2017 | China | 2625 (46.9) | 15.1 ± 1.70 | TV, VG | Self-reported school grades:<br>- GPA | Age and sex.                                                                                                     |
| NA: not available; TV: television viewing; VG: video game playing; Screen media indicates a composite measure of 2 or more screen activities; GPA: grade point average; BMI: body mass index; SES: socioeconomic status. |      |       |             |             |        |                                       |                                                                                                                  |

**eTable 2.** Data from Included Studies Examining the Linear Associations or Mean Differences Between Duration of Screen-based Activities and Academic Performance in Children and Adolescents

| Author                                       | Unadjusted analysis                                                                                                                                                                                                                                                                                                                                                                                                                                                                                                                                                                                                                                              | Adjusted analysis                                                                                                                                                                                                                                                                                                                                                                                                                                                                                                                                                                                                                                                                        |
|----------------------------------------------|------------------------------------------------------------------------------------------------------------------------------------------------------------------------------------------------------------------------------------------------------------------------------------------------------------------------------------------------------------------------------------------------------------------------------------------------------------------------------------------------------------------------------------------------------------------------------------------------------------------------------------------------------------------|------------------------------------------------------------------------------------------------------------------------------------------------------------------------------------------------------------------------------------------------------------------------------------------------------------------------------------------------------------------------------------------------------------------------------------------------------------------------------------------------------------------------------------------------------------------------------------------------------------------------------------------------------------------------------------------|
| Adelantado-Renau et al <sup>25</sup><br>2019 | Spearman correlations coefficients:<br><b>Internet</b><br>✓ Math: -0.156*<br>✓ Language: -0.168*<br>✓ Grade point average: -0.187*<br>✓ Verbal ability: -0.084<br>✓ Numeric ability: -0.096<br><b>Mobile phone</b><br>✓ Math: -0.097<br>✓ Language: -0.066<br>✓ Grade point average: -0.116<br>✓ Verbal ability: -0.055<br>✓ Numeric ability: -0.119<br><b>Television</b><br>✓ Math: -0.002<br>✓ Language: -0.108<br>✓ Grade point average: -0.052<br>✓ Verbal ability: 0.073<br>✓ Numeric ability: -0.050<br><b>Videogames</b><br>✓ Math: -0.021<br>✓ Language: -0.158*<br>✓ Grade point average: -0.087<br>✓ Verbal ability: 0.055<br>✓ Numeric ability: 0.090 | Partial correlations adjusted by sex and pubertal status:<br><b>Internet</b><br>✓ Math: -0.193*<br>✓ Language: -0.165*<br>✓ Grade point average: -0.221*<br>✓ Verbal ability: -0.068<br>✓ Numeric ability: -0.100<br><b>Mobile phone</b><br>✓ Math: -0.092<br>✓ Language: -0.110<br>✓ Grade point average: -0.143*<br>✓ Verbal ability: -0.034<br>✓ Numeric ability: -0.089<br><b>Television</b><br>✓ Math: -0.003<br>✓ Language: -0.028<br>✓ Grade point average: -0.057<br>✓ Verbal ability: -0.057<br>✓ Numeric ability: 0.116<br><b>Videogames</b><br>✓ Math: -0.051<br>✓ Language: -0.050<br>✓ Grade point average: -0.076<br>✓ Verbal ability: -0.014<br>✓ Numeric ability: -0.005 |
| Busch et al <sup>26</sup><br>2017            | NA                                                                                                                                                                                                                                                                                                                                                                                                                                                                                                                                                                                                                                                               | Mixed-effects regression models.<br><b>Internet use</b><br><i>Girls</i><br>✓ Grade point average: -0.130*<br><i>Boys</i><br>✓ Grade point average: NA                                                                                                                                                                                                                                                                                                                                                                                                                                                                                                                                    |
| Caldas and Bankston <sup>27</sup><br>1999    | Zero-Order correlations coefficients:<br><b>TV viewing</b>                                                                                                                                                                                                                                                                                                                                                                                                                                                                                                                                                                                                       | Multivariate linear regression adjusted by                                                                                                                                                                                                                                                                                                                                                                                                                                                                                                                                                                                                                                               |

|                                               |                                                                                                                                                            |                                                                                                                                                                                                                                                                                                                                                                                                                                                                                                                                                                    |
|-----------------------------------------------|------------------------------------------------------------------------------------------------------------------------------------------------------------|--------------------------------------------------------------------------------------------------------------------------------------------------------------------------------------------------------------------------------------------------------------------------------------------------------------------------------------------------------------------------------------------------------------------------------------------------------------------------------------------------------------------------------------------------------------------|
|                                               | <p><i>White students</i><br/> ✓ Academic achievement: -0.105*<br/> <i>African-American students</i><br/> ✓ Academic achievement: 0.023*</p>                | <p>Model 1: control variables (sex, English proficiency, time spent at work, and time spent in organized activities) and individual television watching habits.<br/> <b>TV viewing</b><br/> <i>White students</i><br/> ✓ Academic achievement: -0.107*<br/> <i>African-American students</i><br/> ✓ Academic achievement: 0.011<br/> Model 2: control variables + family SES<br/> <b>TV viewing</b><br/> <i>White students</i><br/> ✓ Academic achievement: -0.077*<br/> <i>African-American students</i><br/> ✓ Academic achievement: 0.013</p>                   |
| Clarke and Kurtz-Costes <sup>28</sup><br>1997 | NA                                                                                                                                                         | <p>Partial correlations adjusted by age:<br/> <b>TV viewing</b><br/> ✓ Reading: -0.329*</p>                                                                                                                                                                                                                                                                                                                                                                                                                                                                        |
| Cooper et al <sup>29</sup><br>1999            | <p>Bivariate correlations coefficients:<br/> <b>TV viewing</b><br/> ✓ Academic achievement: -0.13*<br/> ✓ Teacher-assigned grade point average: -0.11*</p> | <p>Semipartial correlations coefficients (covariates NA):<br/> <b>TV viewing</b><br/> ✓ Academic achievement: 0.07<br/> ✓ Teacher-assigned grade point average: 0.08</p>                                                                                                                                                                                                                                                                                                                                                                                           |
| Dumuid et al <sup>30</sup><br>2017            | NA                                                                                                                                                         | <p>Cluster analysis adjusted by sex, parental highest education, mother's employment hours, number of siblings and number of parents, BMI, and school attended:<br/> <b>Screen media<sup>†</sup></b><br/> <i>a) Unhealthiest diet, highest screen time and moderate PA</i><br/> ✓ Grammar: 472 (82)<sup>a</sup><br/> ✓ Reading: 491 (77)<sup>a</sup><br/> ✓ Writing: 471 (64)<br/> ✓ Spelling: 479 (64)<sup>a</sup><br/> ✓ Numeracy: 470 (60)<sup>a</sup><br/> ✓ Overall: 477 (57)<sup>a</sup><br/> <i>b) Healthiest diet, lowest screen time, moderate PA</i></p> |

|                                             |    |                                                                                                                                                                                                                                                                                                                                                                                                                                                                                                                                                                                                                                                                                                                                                                                                                                              |
|---------------------------------------------|----|----------------------------------------------------------------------------------------------------------------------------------------------------------------------------------------------------------------------------------------------------------------------------------------------------------------------------------------------------------------------------------------------------------------------------------------------------------------------------------------------------------------------------------------------------------------------------------------------------------------------------------------------------------------------------------------------------------------------------------------------------------------------------------------------------------------------------------------------|
|                                             |    | <ul style="list-style-type: none"> <li>✓ Grammar: 514 (80)</li> <li>✓ Reading: 516 (76)<sup>b</sup></li> <li>✓ Writing: 487 (52)</li> <li>✓ Spelling: 509 (64)</li> <li>✓ Numeracy: 498 (63)</li> <li>✓ Overall: 505 (55)</li> <li><i>c) Highest PA, lowest sedentary behavior</i></li> <li>✓ Grammar: 497 (75)<sup>b</sup></li> <li>✓ Reading: 501 (76)<sup>c</sup></li> <li>✓ Writing: 476 (54)</li> <li>✓ Spelling: 502 (65)<sup>b</sup></li> <li>✓ Numeracy: 496 (69)</li> <li>✓ Overall: 494 (58)<sup>b</sup></li> <li><i>d) Highest sedentary behavior, lowest PA</i></li> <li>✓ Grammar: 515 (89)<sup>a,b</sup></li> <li>✓ Reading: 522 (78)<sup>a,b,c</sup></li> <li>✓ Writing: 478 (51)</li> <li>✓ Spelling: 515 (72)<sup>a,b</sup></li> <li>✓ Numeracy: 488 (63)<sup>a</sup></li> <li>✓ Overall: 504 (58)<sup>a,b</sup></li> </ul> |
| Drummond and Sauer <sup>12</sup><br>2014    | NA | NA                                                                                                                                                                                                                                                                                                                                                                                                                                                                                                                                                                                                                                                                                                                                                                                                                                           |
| Esteban-Cornejo et al <sup>31</sup><br>2015 | NA | <p>Linear regression adjusted by sex, age, city, maternal education, birth weight, gestational age, BMI, fitness and moderate-to vigorous physical activity:</p> <p><b>Internet</b></p> <ul style="list-style-type: none"> <li>✓ Math: -0.067*</li> <li>✓ Language: -0.066*</li> <li>✓ Overall of both: -0.072*</li> <li>✓ Grade point average: -0.091*</li> </ul> <p><b>TV viewing</b></p> <ul style="list-style-type: none"> <li>✓ Math: 0.009</li> <li>✓ Language: 0.001</li> <li>✓ Overall of both: 0.005</li> <li>✓ Grade point average: 0.001</li> </ul> <p><b>Video games playing</b></p> <ul style="list-style-type: none"> <li>✓ Math: -0.033</li> </ul>                                                                                                                                                                            |

|                                                 |                                                                                                                                                                                                                                                                                                    |                                                                                                                                                                                                                                                                                                                                                                                                                          |
|-------------------------------------------------|----------------------------------------------------------------------------------------------------------------------------------------------------------------------------------------------------------------------------------------------------------------------------------------------------|--------------------------------------------------------------------------------------------------------------------------------------------------------------------------------------------------------------------------------------------------------------------------------------------------------------------------------------------------------------------------------------------------------------------------|
|                                                 |                                                                                                                                                                                                                                                                                                    | <ul style="list-style-type: none"> <li>✓ Language: -0.009</li> <li>✓ Overall of both: -0.022</li> <li>✓ Grade point average: -0.048</li> </ul>                                                                                                                                                                                                                                                                           |
| Ferguson <sup>33</sup><br>2011                  | Bivariate correlations coefficients:<br><b>TV viewing</b><br><ul style="list-style-type: none"> <li>✓ Academic achievement: 0.06</li> </ul> <b>Video game playing</b><br><ul style="list-style-type: none"> <li>✓ Academic achievement: -0.05</li> </ul>                                           | Hierarchical multiple regression with gender, number of children and family income, depression, anxiety, psychological aggression and neighborhood-related variables entered in the model.<br><b>TV viewing</b><br><ul style="list-style-type: none"> <li>✓ Academic achievement: 0.07</li> </ul> <b>Video game playing</b><br><ul style="list-style-type: none"> <li>✓ Academic achievement: -0.07</li> </ul>           |
| Fetler <sup>34</sup><br>1984                    | Bivariate correlations coefficients:<br><b>TV viewing</b><br><ul style="list-style-type: none"> <li>✓ Academic achievement: -0.15</li> </ul>                                                                                                                                                       | NA                                                                                                                                                                                                                                                                                                                                                                                                                       |
| García-Hermoso and Marina <sup>35</sup><br>2017 | Analysis of variance:<br><b>Screen media</b> ; <2 vs. ≥2 hours per day<br><i>Girls</i><br><ul style="list-style-type: none"> <li>✓ Overall of language and math: F = 3.304*</li> </ul> <i>Boys</i><br><ul style="list-style-type: none"> <li>✓ Overall of language and math: F = 3.825*</li> </ul> | Analysis of covariance adjusted by age, birth weight, SES, maternal education and weight status, and physical activity:<br><b>Screen media</b> ; <2 vs. ≥2 hours per day<br><i>Girls</i><br><ul style="list-style-type: none"> <li>✓ Overall of language and math: F = 3.114*</li> </ul> <i>Boys</i><br><ul style="list-style-type: none"> <li>✓ Overall of language and math: F = 3.325*</li> </ul>                     |
| Hastings et al <sup>36</sup><br>2009            | Pearson correlations coefficients:<br><b>Video games playing</b><br><ul style="list-style-type: none"> <li>✓ Academic achievement: -0.09</li> </ul>                                                                                                                                                | NA                                                                                                                                                                                                                                                                                                                                                                                                                       |
| Hartanto et al <sup>37</sup><br>2018            | NA                                                                                                                                                                                                                                                                                                 | Square regression adjusted by gender, race, SES, home language, and family composition: ECLS dataset<br><b>Video games playing</b><br><i>Weekday</i><br><ul style="list-style-type: none"> <li>✓ Math: -0.15*</li> <li>✓ Reading: -0.16*</li> <li>✓ Science: -0.14*</li> </ul> <i>Weekend day</i><br><ul style="list-style-type: none"> <li>✓ Math: 0.05*</li> <li>✓ Reading: 0.08*</li> <li>✓ Science: 0.07*</li> </ul> |

|                                     |                                                                                                                                                                                                                                              |                                                                                                                                                                                                                                                                                                                                                                                                                                                      |
|-------------------------------------|----------------------------------------------------------------------------------------------------------------------------------------------------------------------------------------------------------------------------------------------|------------------------------------------------------------------------------------------------------------------------------------------------------------------------------------------------------------------------------------------------------------------------------------------------------------------------------------------------------------------------------------------------------------------------------------------------------|
|                                     |                                                                                                                                                                                                                                              | <p>ELS dataset</p> <p><b>Video games playing</b></p> <p><i>Weekday</i></p> <p>✓ Math: -0.10*</p> <p>✓ Reading: -0.11 *</p> <p><i>Weekend day</i></p> <p>✓ Math: 0.04 *</p> <p>✓ Reading: 0.06*</p> <p>NELS dataset</p> <p><b>Video games playing</b></p> <p><i>Weekday</i></p> <p>✓ Math: -0.09*</p> <p>✓ Reading: -0.11*</p> <p>✓ Science: -0.10*</p> <p><i>Weekend day</i></p> <p>✓ Math: 0.03*</p> <p>✓ Reading: 0.02</p> <p>✓ Science: 0.04*</p> |
| Inal et al <sup>38</sup><br>2012    | <p>Bivariate correlations coefficients:</p> <p><b>Internet use</b></p> <p>✓ Academic achievement: -0.449*</p>                                                                                                                                | NA                                                                                                                                                                                                                                                                                                                                                                                                                                                   |
| Jackson et al <sup>39</sup><br>2008 | <p>Linear regression coefficients:</p> <p><b>Internet use</b></p> <p>✓ Grade point average: -0.23</p> <p><b>Mobile phone use</b></p> <p>✓ Grade point average: NA</p> <p><b>Video games playing</b></p> <p>✓ Grade point average: -0.20*</p> | NA                                                                                                                                                                                                                                                                                                                                                                                                                                                   |
| Jackson et al <sup>40</sup><br>2011 | NA                                                                                                                                                                                                                                           | <p>Hierarchical regression adjusted by gender, race, age and income:</p> <p><b>Internet use</b></p> <p>✓ Perceived school grades: 0.06</p> <p>✓ Grade point average: 0.09</p> <p>✓ Math: 0.02</p> <p>✓ Reading: 0.32</p> <p><b>Mobile phone use</b></p> <p>✓ Perceived school grades: -0.04</p> <p>✓ Grade point average: -0.03</p>                                                                                                                  |

|                                                      |                                                                                                                                                                                                                                                                                                                                     |                                                                                                                                                                                                                                                                |
|------------------------------------------------------|-------------------------------------------------------------------------------------------------------------------------------------------------------------------------------------------------------------------------------------------------------------------------------------------------------------------------------------|----------------------------------------------------------------------------------------------------------------------------------------------------------------------------------------------------------------------------------------------------------------|
|                                                      |                                                                                                                                                                                                                                                                                                                                     | <ul style="list-style-type: none"> <li>✓ Math: 0.05</li> <li>✓ Reading: -0.04</li> <li><b>Video games playing</b></li> <li>✓ Perceived school grades: -0.06</li> <li>✓ Grade point average: -0.013*</li> <li>✓ Math: -0.08</li> <li>✓ Reading: 0.07</li> </ul> |
| Jeong and Kim <sup>42</sup><br>2011                  | Zero-order Pearson correlation coefficients:<br><b>Video games playing</b><br>✓ Grade point average: -0.15***                                                                                                                                                                                                                       | NA                                                                                                                                                                                                                                                             |
| Keith et al <sup>43</sup><br>1986                    | Bivariate correlations coefficients:<br><b>TV viewing</b><br>✓ Academic achievement: -0.200                                                                                                                                                                                                                                         | NA                                                                                                                                                                                                                                                             |
| Kiatrungrit and Hongsanguansri <sup>44</sup><br>2014 | Pearson correlation coefficients:<br><b>Computer use</b><br>✓ Grade point average: -0.046<br><b>Mobile phone use</b><br>✓ Grade point average: -0.031<br><b>TV viewing</b><br>✓ Grade point average: -0.008<br><b>Video games playing</b><br>✓ Grade point average: -0.094*<br><b>Screen media</b><br>✓ Grade point average: -0.039 | NA                                                                                                                                                                                                                                                             |
| Kovacs et al <sup>46</sup><br>2008                   | Logistic regression coefficients:<br><b>TV viewing</b><br>✓ Academic failure (≥3 failed subjects):<br><2 hours per day: 1.38***                                                                                                                                                                                                     | NA                                                                                                                                                                                                                                                             |
| Kristjánsson et al <sup>48</sup><br>2009             | NA                                                                                                                                                                                                                                                                                                                                  | Regression coefficients for the structural model with school contentment as mediating factor:<br><b>TV viewing</b><br>✓ Grade point average: -0.11*                                                                                                            |
| Kureishi and Yoshida <sup>49</sup><br>2013           | NA                                                                                                                                                                                                                                                                                                                                  | Estimation model:<br><b>TV viewing</b><br><i>Weekdays</i><br>✓ Grade point average: -0.136<br><i>Saturday</i><br>✓ Grade point average: -0.637                                                                                                                 |



|                                          |                                                                                                                                                                                    |                                                                                                                                                                                                                                                                   |
|------------------------------------------|------------------------------------------------------------------------------------------------------------------------------------------------------------------------------------|-------------------------------------------------------------------------------------------------------------------------------------------------------------------------------------------------------------------------------------------------------------------|
|                                          |                                                                                                                                                                                    | <i>Sunday</i><br>✓ Grade point average: -0.788<br><i>Wednesday</i><br>✓ Grade point average: -1.108                                                                                                                                                               |
| Leng et al <sup>50</sup><br>2009         | Independent sample t-test on gamers and non-gamers<br>Academic achievement: $t = 2.547^*$                                                                                          | NA                                                                                                                                                                                                                                                                |
| Malhi et al <sup>51</sup><br>2016        | NA                                                                                                                                                                                 | NA                                                                                                                                                                                                                                                                |
| Morita et al <sup>8</sup><br>2016        | Univariate correlation coefficients:<br><b>Screen media</b><br><i>Girls</i><br>✓ Grade point average: -0.036<br><i>Boys</i><br>✓ Grade point average: -0.241*                      | Multiple regression analyses adjusted by household income, mother's education, cram school utilization, weight status and physical fitness:<br><b>Screen media</b><br><i>Girls</i><br>✓ Grade point average: 0.021<br><i>Boys</i><br>Grade point average: -0.206* |
| Özmert et al <sup>10</sup><br>2002       | Pearson correlation coefficients:<br><b>TV viewing</b><br>✓ School performance: 0.11*                                                                                              | NA                                                                                                                                                                                                                                                                |
| Özmert et al <sup>54</sup><br>2011       | NA                                                                                                                                                                                 | NA                                                                                                                                                                                                                                                                |
| Peirce <sup>55</sup><br>1983             | Pearson correlation coefficients:<br><b>TV viewing</b><br>✓ Writing: -0.36*                                                                                                        | Multiple regression including number of books, parent interest and education.<br><b>TV viewing</b><br>✓ Writing: $F = 9.752^*$                                                                                                                                    |
| Peiró-Velert et al <sup>56</sup><br>2014 | Spearman correlation coefficients:<br><b>Computer use</b><br>✓ Academic achievement: -0.48 (-0.58, -0.37)*<br><b>Screen media</b><br>✓ Academic achievement: -0.55 (-0.64, -0.45)* | NA                                                                                                                                                                                                                                                                |
| Potter <sup>57</sup><br>1987             | Zero-order Pearson correlation coefficients:<br><b>TV viewing</b><br>✓ Language: -0.01<br>✓ Math: -0.08<br>✓ Reading: -0.06                                                        | Partial correlation coefficients adjusted by intelligence quotient:<br><b>TV viewing</b><br>✓ Language: -0.01<br>✓ Math: 0.09                                                                                                                                     |

|                                             |                                                                                                                                                                                                                                                                                                                                                                                                                                                                                                                                                                                                                                   |                                                                                                                                                                                                                                                     |
|---------------------------------------------|-----------------------------------------------------------------------------------------------------------------------------------------------------------------------------------------------------------------------------------------------------------------------------------------------------------------------------------------------------------------------------------------------------------------------------------------------------------------------------------------------------------------------------------------------------------------------------------------------------------------------------------|-----------------------------------------------------------------------------------------------------------------------------------------------------------------------------------------------------------------------------------------------------|
|                                             | <ul style="list-style-type: none"> <li>✓ Overall of language, math and reading: -0.04</li> <li>✓ Science: -0.04</li> <li>✓ Social studies: -0.04</li> </ul>                                                                                                                                                                                                                                                                                                                                                                                                                                                                       | <ul style="list-style-type: none"> <li>✓ Reading: -0.07</li> <li>✓ Overall of language, math and reading: 0.04</li> <li>✓ Science: 0.04</li> <li>✓ Social studies: 0.04</li> </ul>                                                                  |
| Poulain et al <sup>58</sup><br>2018         | NA                                                                                                                                                                                                                                                                                                                                                                                                                                                                                                                                                                                                                                | Linear regression adjusted by age, gender, SES, year of data assessment and BMI:<br><b>Screen media<sup>§</sup></b> <ul style="list-style-type: none"> <li>✓ Math: 0.02*</li> <li>✓ Language: 0.02**</li> <li>✓ Physical Education: 0.01</li> </ul> |
| Regondola and Barbado <sup>13</sup><br>2017 | Point biserial correlation coefficients:<br><b>Screen media</b><br><i>Girls</i> <ul style="list-style-type: none"> <li>✓ Grade point average of:</li> <li>2<sup>nd</sup> grade: -0.13</li> <li>3<sup>rd</sup> grade: 0.34</li> <li>4<sup>th</sup> grade: 0.22</li> <li>5<sup>th</sup> grade: -0.30</li> <li>6<sup>th</sup> grade: 0.14</li> </ul> <i>Boys</i> <ul style="list-style-type: none"> <li>✓ Grade point average of:</li> <li>2<sup>nd</sup> grade: -0.67*</li> <li>3<sup>rd</sup> grade: -0.19</li> <li>4<sup>th</sup> grade: 0.13</li> <li>5<sup>th</sup> grade: 0.08</li> <li>6<sup>th</sup> grade: -0.03</li> </ul> | NA                                                                                                                                                                                                                                                  |
| Ribner et al <sup>59</sup><br>2017          | Correlation coefficients:<br><b>TV viewing</b> <ul style="list-style-type: none"> <li>✓ Applied problems score: -0.250*</li> <li>✓ Letter-Word score: -0.146*</li> </ul>                                                                                                                                                                                                                                                                                                                                                                                                                                                          | Linear regression adjusted by Raven's Matrix score, income-to-needs ratio, age and sex:<br><b>TV viewing</b> <ul style="list-style-type: none"> <li>✓ Applied problems score: -0.13*</li> <li>✓ Letter-Word score: -0.03</li> </ul>                 |
| Ridley-Johnson et al <sup>60</sup><br>1983  | Correlation coefficients:<br><b>TV viewing</b> <ul style="list-style-type: none"> <li>✓ Math: -0.14*</li> <li>✓ Reading: -0.14*</li> </ul>                                                                                                                                                                                                                                                                                                                                                                                                                                                                                        | NA                                                                                                                                                                                                                                                  |
| Scott <sup>62</sup><br>1958                 | NA                                                                                                                                                                                                                                                                                                                                                                                                                                                                                                                                                                                                                                | Comparisons between groups adjusted by intelligence quotient and age:<br><b>TV viewing</b>                                                                                                                                                          |

|                                                |                                                                                                                                                                                                                                                                                                                                                                                                                                                                                                                                    |                                                                                                                                                                                                                                                                                                                                                                                                                               |
|------------------------------------------------|------------------------------------------------------------------------------------------------------------------------------------------------------------------------------------------------------------------------------------------------------------------------------------------------------------------------------------------------------------------------------------------------------------------------------------------------------------------------------------------------------------------------------------|-------------------------------------------------------------------------------------------------------------------------------------------------------------------------------------------------------------------------------------------------------------------------------------------------------------------------------------------------------------------------------------------------------------------------------|
|                                                |                                                                                                                                                                                                                                                                                                                                                                                                                                                                                                                                    | <ul style="list-style-type: none"> <li>✓ Arithmetic:<br/>Low TV viewing: 92.10<br/>High TV viewing: 89.07*</li> <li>✓ Language:<br/>Low TV viewing: 93.37<br/>High TV viewing: 92.27</li> <li>✓ Reading:<br/>Low TV viewing: 93.81<br/>High TV viewing: 90.91*</li> <li>✓ Spelling:<br/>Low TV viewing: 94.65<br/>High TV viewing: 92.40</li> <li>✓ Overall:<br/>Low TV viewing: 92.88<br/>High TV viewing: 90.37*</li> </ul> |
| Sharif and Sargent <sup>63</sup><br>2006       | <p>Spearman correlation coefficients:</p> <p><b>TV viewing</b></p> <p><i>Weekday</i></p> <ul style="list-style-type: none"> <li>✓ Grade point average: 0.01*</li> </ul> <p><i>Weekend day</i></p> <ul style="list-style-type: none"> <li>✓ Grade point average: -0.01*</li> </ul> <p><b>Video games playing</b></p> <p><i>Weekday</i></p> <ul style="list-style-type: none"> <li>✓ Grade point average: -0.03*</li> </ul> <p><i>Weekend day</i></p> <ul style="list-style-type: none"> <li>✓ Grade point average: -0.05</li> </ul> | NA                                                                                                                                                                                                                                                                                                                                                                                                                            |
| Sharma et al <sup>64</sup><br>2017             | <p>Correlation coefficients:</p> <p><b>TV viewing</b></p> <ul style="list-style-type: none"> <li>✓ Grade point average: -0.111*</li> </ul>                                                                                                                                                                                                                                                                                                                                                                                         | NA                                                                                                                                                                                                                                                                                                                                                                                                                            |
| Shejwal and Purayidathil <sup>66</sup><br>2006 | <p>Correlation coefficients:</p> <p><b>TV viewing</b></p> <p><i>Girls</i></p> <ul style="list-style-type: none"> <li>✓ Grade point average: -0.364*</li> </ul> <p><i>Boys:</i></p> <ul style="list-style-type: none"> <li>✓ Grade point average: -0.292*</li> <li>✓ Mathematical reasoning: -0.135*</li> </ul>                                                                                                                                                                                                                     | NA                                                                                                                                                                                                                                                                                                                                                                                                                            |

|                                             |                                                                                                                                                                  |                                                                                                                                                                                                                                                           |
|---------------------------------------------|------------------------------------------------------------------------------------------------------------------------------------------------------------------|-----------------------------------------------------------------------------------------------------------------------------------------------------------------------------------------------------------------------------------------------------------|
| Shin <sup>67</sup><br>2004                  | Correlation coefficients:<br><b>TV viewing</b><br>✓ Applied problem: -0.12*<br>✓ Calculation: -0.10*<br>✓ Letter-word: -0.10*<br>✓ Passage comprehension: -0.11* | NA                                                                                                                                                                                                                                                        |
| Skoric et al <sup>11</sup><br>2009          | NA                                                                                                                                                               | Hierarchical regressions adjusted by gender and race:<br><b>Video games playing</b><br><i>Weekday</i><br>✓ English: 0.19*<br>✓ Mathematics: -0.11<br>✓ Science: 0.05<br><i>Weekend day</i><br>✓ English: -0.08<br>✓ Mathematics: 0.07<br>✓ Science: -0.05 |
| Syväoja et al <sup>9</sup><br>2013          | Pearson's correlation coefficients:<br><b>Screen media</b><br>✓ Grade point average: -0.276*                                                                     | Linear regression adjusted by the mother's and father's education, family income, marital status, and children's learning difficulties.<br><b>Screen media</b><br>✓ Grade point average: -0.193*                                                          |
| Syväoja et al <sup>68</sup><br>2018         | Correlation coefficients:<br><b>Screen media</b><br>✓ Grade point average: -0.294 (-0.354, 0.234)                                                                | Linear regression adjusted by sex, age, mother's education and learning difficulties.<br><b>Screen media</b><br>✓ Grade point average: -0.173 (-0.243, -0.104)*                                                                                           |
| Van Schie and Wiegman <sup>70</sup><br>1997 | Correlation coefficients:<br><b>Video games playing</b><br>✓ Arithmetic skills: 0.02<br>✓ Language skills: 0.08<br>✓ General school performance: 0.05            | Partial correlation coefficients adjusted by intelligence:<br><b>Video games playing</b><br>✓ Arithmetic skills: 0.02<br>✓ Language skills: -0.03<br>✓ General school performance: -0.01                                                                  |
| Vassiloudis et al <sup>71</sup><br>2014     | Spearman correlation coefficients:<br><b>TV viewing</b><br>✓ Grade point average: -0.28*<br><b>Video games playing</b><br>✓ Grade point average: -0.10*          | Block stepwise linear regression analysis entering adherence to Mediterranean diet, BMI, hours of sleep, physical activity level, self-esteem, father's and mother's educational level, mother's ethnicity and family income.<br><b>TV viewing</b>        |

|                                                                                                                                                                                                                                                                                                                                                                                |                                                                                          |                                                                                                                                                                                                                                |
|--------------------------------------------------------------------------------------------------------------------------------------------------------------------------------------------------------------------------------------------------------------------------------------------------------------------------------------------------------------------------------|------------------------------------------------------------------------------------------|--------------------------------------------------------------------------------------------------------------------------------------------------------------------------------------------------------------------------------|
|                                                                                                                                                                                                                                                                                                                                                                                |                                                                                          | ✓ Grade point average: -0.068                                                                                                                                                                                                  |
| Walberg and Weinstein <sup>72</sup><br>1982                                                                                                                                                                                                                                                                                                                                    | Spearman correlation coefficients:<br><b>TV viewing</b><br>✓ Grade point average: -0.12* | Partial correlation coefficients adjusted by attitude, SES, homework, extracurricular activities, school-related instructions, class and home environment, sex and race:<br><b>TV viewing</b><br>✓ Grade point average: -0.07* |
| Walberg and Tsai <sup>73</sup><br>1984                                                                                                                                                                                                                                                                                                                                         | Correlation coefficients:<br><b>TV viewing</b><br>✓ Reading: 0.139*                      | NA                                                                                                                                                                                                                             |
| Welch et al <sup>75</sup><br>1986                                                                                                                                                                                                                                                                                                                                              | Intercorrelation coefficients:<br><b>TV viewing</b><br>✓ Grade point average: -0.10      | Raw regression weights entering ability, motivation, quality and quantity of instruction, class and home environment, gender and race:<br><b>TV viewing</b><br>✓ Grade point average: -0.13                                    |
| <p>* Significant associations. NA: not available. TV: television viewing; Screen media indicates a composite measure of 2 or more screen activities; BMI: body mass index; SES: socioeconomic status.<br/> <sup>†</sup> Values with the same superscript are significantly different from each other.<br/> <sup>§</sup> Lower academic values indicate better performance.</p> |                                                                                          |                                                                                                                                                                                                                                |

**eTable 3.** Study Quality Assessed by the Quality Assessment Tool for Observational Cohort and Cross-Sectional Studies

| Author                                  | Items of quality assessment tool for observational cohort and cross-sectional studies |   |   |   |   |   |    |   |   |    |    |    |    |    | Total score |
|-----------------------------------------|---------------------------------------------------------------------------------------|---|---|---|---|---|----|---|---|----|----|----|----|----|-------------|
|                                         | 1                                                                                     | 2 | 3 | 4 | 5 | 6 | 7  | 8 | 9 | 10 | 11 | 12 | 13 | 14 |             |
| Adelantado-Renau et al <sup>25</sup>    | ●                                                                                     | ● | ● | ● | ● | ● | NA | ● | ● | NA | ●  | NA | NA | ●  | 8           |
| Busch et al <sup>26</sup>               | ●                                                                                     | ● | ● | ● | ● | ● | NA | ● | ● | NA | ●  | NA | NA | ●  | 8           |
| Caldas and Bankston <sup>27</sup>       | ●                                                                                     | ● | ● | ● | ● | ● | NA | ● | ● | NA | ●  | NA | NA | ●  | 7           |
| Clarke and Kurtz-Costes <sup>28</sup>   | ●                                                                                     | ● | ● | ● | ● | ● | NA | ● | ● | NA | ●  | NA | NA | ●  | 5           |
| Cooper et al <sup>29</sup>              | ●                                                                                     | ● | ● | ● | ● | ● | NA | ● | ● | NA | ●  | NA | NA | ●  | 6           |
| Dumuid et al <sup>30</sup>              | ●                                                                                     | ● | ● | ● | ● | ● | NA | ● | ● | NA | ●  | NA | NA | ●  | 9           |
| Drummond and Sauer <sup>12</sup>        | ●                                                                                     | ● | ● | ● | ● | ● | NA | ● | ● | NA | ●  | NA | NA | ●  | 4           |
| Esteban-Cornejo et al <sup>31</sup>     | ●                                                                                     | ● | ● | ● | ● | ● | NA | ● | ● | NA | ●  | NA | NA | ●  | 8           |
| Faught et al <sup>32</sup>              | ●                                                                                     | ● | ● | ● | ● | ● | NA | ● | ● | NA | ●  | NA | NA | ●  | 7           |
| Ferguson <sup>33</sup>                  | ●                                                                                     | ● | ● | ● | ● | ● | NA | ● | ● | NA | ●  | NA | NA | ●  | 5           |
| Fetler <sup>34</sup>                    | ●                                                                                     | ● | ● | ● | ● | ● | NA | ● | ● | NA | ●  | NA | NA | ●  | 6           |
| García-Hermoso and Marina <sup>35</sup> | ●                                                                                     | ● | ● | ● | ● | ● | NA | ● | ● | NA | ●  | NA | NA | ●  | 8           |
| Hastings et al <sup>36</sup>            | ●                                                                                     | ● | ● | ● | ● | ● | NA | ● | ● | NA | ●  | NA | NA | ●  | 6           |
| Hartanto et al <sup>37</sup>            | ●                                                                                     | ● | ● | ● | ● | ● | NA | ● | ● | NA | ●  | NA | NA | ●  | 6           |
| Inal et al <sup>38</sup>                | ●                                                                                     | ● | ● | ● | ● | ● | NA | ● | ● | NA | ●  | NA | NA | ●  | 4           |
| Jackson et al <sup>39</sup>             | ●                                                                                     | ● | ● | ● | ● | ● | NA | ● | ● | NA | ●  | NA | NA | ●  | 4           |
| Jackson et al <sup>40</sup>             | ●                                                                                     | ● | ● | ● | ● | ● | NA | ● | ● | NA | ●  | NA | NA | ●  | 7           |
| Jaruratanasirikul et al <sup>41</sup>   | ●                                                                                     | ● | ● | ● | ● | ● | NA | ● | ● | NA | ●  | NA | NA | ●  | 5           |
| Jeong and Kim <sup>42</sup>             | ●                                                                                     | ● | ● | ● | ● | ● | NA | ● | ● | NA | ●  | NA | NA | ●  | 5           |
| Keith et al <sup>43</sup>               | ●                                                                                     | ● | ● | ● | ● | ● | NA | ● | ● | NA | ●  | NA | NA | ●  | 5           |

|                                                |   |   |   |   |   |   |    |   |   |    |   |    |    |   |   |
|------------------------------------------------|---|---|---|---|---|---|----|---|---|----|---|----|----|---|---|
| Kiatrungrit and Hongsanguansri <sup>44</sup>   | ● | ● | ● | ● | ● | ● | NA | ● | ● | NA | ● | NA | NA | ● | 3 |
| Kim et al <sup>45</sup>                        | ● | ● | ● | ● | ● | ● | NA | ● | ● | NA | ● | NA | NA | ● | 8 |
| Kovacs et al <sup>46</sup>                     | ● | ● | ● | ● | ● | ● | NA | ● | ● | NA | ● | NA | NA | ● | 4 |
| Kovess-Masfety et al <sup>47</sup>             | ● | ● | ● | ● | ● | ● | NA | ● | ● | NA | ● | NA | NA | ● | 8 |
| Kristjánsson et al <sup>48</sup>               | ● | ● | ● | ● | ● | ● | NA | ● | ● | NA | ● | NA | NA | ● | 8 |
| Kureishi and Yoshida <sup>49</sup>             | ● | ● | ● | ● | ● | ● | NA | ● | ● | NA | ● | NA | NA | ● | 6 |
| Leng et al <sup>50</sup>                       | ● | ● | ● | ● | ● | ● | NA | ● | ● | NA | ● | NA | NA | ● | 4 |
| Malhi et al <sup>51</sup>                      | ● | ● | ● | ● | ● | ● | NA | ● | ● | NA | ● | NA | NA | ● | 5 |
| Martínez-Gómez et al <sup>52</sup>             | ● | ● | ● | ● | ● | ● | NA | ● | ● | NA | ● | NA | NA | ● | 8 |
| Morita et al <sup>8</sup>                      | ● | ● | ● | ● | ● | ● | NA | ● | ● | NA | ● | NA | NA | ● | 9 |
| Muñoz-Miralles et al <sup>53</sup>             | ● | ● | ● | ● | ● | ● | NA | ● | ● | NA | ● | NA | NA | ● | 6 |
| Özmerit et al <sup>10</sup>                    | ● | ● | ● | ● | ● | ● | NA | ● | ● | NA | ● | NA | NA | ● | 6 |
| Özmerit et al <sup>54</sup>                    | ● | ● | ● | ● | ● | ● | NA | ● | ● | NA | ● | NA | NA | ● | 4 |
| Peirce <sup>55</sup>                           | ● | ● | ● | ● | ● | ● | NA | ● | ● | NA | ● | NA | NA | ● | 4 |
| Peiró-Velert et al <sup>56</sup>               | ● | ● | ● | ● | ● | ● | NA | ● | ● | NA | ● | NA | NA | ● | 6 |
| Potter <sup>57</sup>                           | ● | ● | ● | ● | ● | ● | NA | ● | ● | NA | ● | NA | NA | ● | 6 |
| Poulain et al <sup>58</sup>                    | ● | ● | ● | ● | ● | ● | NA | ● | ● | NA | ● | NA | NA | ● | 7 |
| Regondola and Barbado <sup>13</sup>            | ● | ● | ● | ● | ● | ● | NA | ● | ● | NA | ● | NA | NA | ● | 4 |
| Ribner et al <sup>59</sup>                     | ● | ● | ● | ● | ● | ● | NA | ● | ● | NA | ● | NA | NA | ● | 5 |
| Ridley-Johnson et al <sup>60</sup>             | ● | ● | ● | ● | ● | ● | NA | ● | ● | NA | ● | NA | NA | ● | 3 |
| Sánchez-Martínez and Otero Puime <sup>61</sup> | ● | ● | ● | ● | ● | ● | NA | ● | ● | NA | ● | NA | NA | ● | 6 |
| Scott <sup>62</sup>                            | ● | ● | ● | ● | ● | ● | NA | ● | ● | NA | ● | NA | NA | ● | 3 |
| Sharif and Sargent <sup>63</sup>               | ● | ● | ● | ● | ● | ● | NA | ● | ● | NA | ● | NA | NA | ● | 8 |
| Sharma et al <sup>64</sup>                     | ● | ● | ● | ● | ● | ● | NA | ● | ● | NA | ● | NA | NA | ● | 7 |
| Shashi Kumar et al <sup>65</sup>               | ● | ● | ● | ● | ● | ● | NA | ● | ● | NA | ● | NA | NA | ● | 3 |

|                                                                                                                                                                      |   |   |   |   |   |   |    |   |   |    |   |    |    |   |   |
|----------------------------------------------------------------------------------------------------------------------------------------------------------------------|---|---|---|---|---|---|----|---|---|----|---|----|----|---|---|
| Shejwal and Purayidathil <sup>66</sup>                                                                                                                               | ● | ● | ● | ● | ● | ● | NA | ● | ● | NA | ● | NA | NA | ● | 4 |
| Shin <sup>67</sup>                                                                                                                                                   | ● | ● | ● | ● | ● | ● | NA | ● | ● | NA | ● | NA | NA | ● | 6 |
| Skoric et al <sup>11</sup>                                                                                                                                           | ● | ● | ● | ● | ● | ● | NA | ● | ● | NA | ● | NA | NA | ● | 7 |
| Syväoja et al <sup>9</sup>                                                                                                                                           | ● | ● | ● | ● | ● | ● | NA | ● | ● | NA | ● | NA | NA | ● | 7 |
| Syväoja et al <sup>68</sup>                                                                                                                                          | ● | ● | ● | ● | ● | ● | NA | ● | ● | NA | ● | NA | NA | ● | 7 |
| Trinh et al <sup>69</sup>                                                                                                                                            | ● | ● | ● | ● | ● | ● | NA | ● | ● | NA | ● | NA | NA | ● | 7 |
| Van Schie and Wiegman <sup>70</sup>                                                                                                                                  | ● | ● | ● | ● | ● | ● | NA | ● | ● | NA | ● | NA | NA | ● | 5 |
| Vassiloudis et al <sup>71</sup>                                                                                                                                      | ● | ● | ● | ● | ● | ● | NA | ● | ● | NA | ● | NA | NA | ● | 9 |
| Walberg and Weinstein <sup>72</sup>                                                                                                                                  | ● | ● | ● | ● | ● | ● | NA | ● | ● | NA | ● | NA | NA | ● | 6 |
| Walberg and Tsai <sup>73</sup>                                                                                                                                       | ● | ● | ● | ● | ● | ● | NA | ● | ● | NA | ● | NA | NA | ● | 6 |
| Wang et al <sup>74</sup>                                                                                                                                             | ● | ● | ● | ● | ● | ● | NA | ● | ● | NA | ● | NA | NA | ● | 7 |
| Welch et al <sup>75</sup>                                                                                                                                            | ● | ● | ● | ● | ● | ● | NA | ● | ● | NA | ● | NA | NA | ● | 5 |
| Yan et al <sup>76</sup>                                                                                                                                              | ● | ● | ● | ● | ● | ● | NA | ● | ● | NA | ● | NA | NA | ● | 7 |
| Green colour indicates “yes”, red indicates “no”, and “yellow” indicates “not reported”.<br>NA: not applicable because of the cross-sectional design of the studies. |   |   |   |   |   |   |    |   |   |    |   |    |    |   |   |



**eTable 4.** Random-Effects Meta-Regression Model to Examine Whether the Associations Between Screen-based Activities and Composite Scores Are Associated With the Children’s and Adolescents’ Age (in Years)

|                       | <b>β (95% CI)</b>       | <b>P</b> |
|-----------------------|-------------------------|----------|
| Screen-based activity |                         |          |
| Screen media          | -0.0005 (-0.131, 0.130) | >.99     |
| TV viewing            | -0.056 (-0.117, 0.006)  | .07      |
| Video games playing   | -0.009 (-0.121, 0.104)  | .82      |

β: standardized coefficient; CI: confidence intervals; TV; television; Screen media indicates a composite measure of 2 or more screen activities.

**eTable 5.** Sensitivity Analysis by Removing the Studies One by One

|                                                      | <b>ES (95% CI)</b>          | <b>I<sup>2</sup></b> |
|------------------------------------------------------|-----------------------------|----------------------|
| <b>Screen media – composite scores</b>               |                             |                      |
| García-Hermoso & Marina 2017 (Boys)                  | -0.24 (-0.63, 0.14)         | 96.6                 |
| García-Hermoso & Marina 2017 (Girls)                 | -0.29 (-0.68, 0.09)         | 96.5                 |
| Kiatrungrit & Hongsanguansri 2014                    | -0.30 (-0.68, 0.08)         | 95.6                 |
| Morita et al 2016 (Boys)                             | -0.27 (-0.66, 0.12)         | 96.6                 |
| Morita et al 2016 (Girls)                            | -0.30 (-0.68, 0.08)         | 96.4                 |
| Peiró-Velert et al 2014                              | -0.25 (-0.43, 0.08)         | 63.1                 |
| Regondola & Barbado 2017 (2 <sup>o</sup> Girls)      | -0.24 (-0.61, 0.13)         | 96.6                 |
| Regondola & Barbado 2017 (2 <sup>o</sup> Boys)       | -0.29 (-0.66, 0.09)         | 96.6                 |
| Regondola & Barbado 2017 (3 <sup>o</sup> Girls)      | -0.28 (-0.66, 0.09)         | 96.6                 |
| Regondola & Barbado 2017 (3 <sup>o</sup> Boys)       | -0.34 (-0.71, 0.03)         | 96.5                 |
| Regondola & Barbado 2017 (4 <sup>o</sup> Girls)      | -0.31 (-0.69, 0.06)         | 96.6                 |
| Regondola & Barbado 2017 (4 <sup>o</sup> Boys)       | -0.32 (-0.69, 0.05)         | 96.6                 |
| Regondola & Barbado 2017 (5 <sup>o</sup> Girls)      | -0.31 (-0.68, 0.07)         | 96.6                 |
| Regondola & Barbado 2017 (5 <sup>o</sup> Boys)       | -0.27 (-0.65, 0.20)         | 96.6                 |
| Regondola & Barbado 2017 (6 <sup>o</sup> Girls)      | -0.30 (-0.68, 0.07)         | 96.6                 |
| Regondola & Barbado 2017 (6 <sup>o</sup> Boys)       | -0.31 (-0.69, 0.06)         | 96.6                 |
| Syväoja et al 2013                                   | -0.26 (-0.66, 0.13)         | 96.6                 |
| Syväoja et al 2018                                   | -0.30 (-0.68, 0.09)         | 95.4                 |
| <b>TV viewing – composite scores</b>                 |                             |                      |
| Adelantado-Renau et al 2019                          | <b>-0.19 (-0.29, -0.10)</b> | 97.7                 |
| Caldas and Bankston 1999 (African-American Students) | <b>-0.20 (-0.30, -0.12)</b> | 96.2                 |
| Caldas and Bankston 1999 (White Students)            | <b>-0.19 (-0.31, -0.08)</b> | 97.7                 |
| Cooper et al 1999                                    | <b>-0.19 (-0.29, -0.09)</b> | 97.7                 |
| Ferguson 2011                                        | <b>-0.21 (-0.31, -0.11)</b> | 97.6                 |
| Fetler 1984                                          | <b>-0.18 (-0.30, -0.08)</b> | 97.6                 |
| Keith et al 1986                                     | <b>-0.17 (-0.26, -0.09)</b> | 95.6                 |
| Kiantrungrit & Hongsanguansri 2014                   | <b>-0.20 (-0.30, -0.10)</b> | 97.6                 |
| Özmert et al 2002                                    | <b>-0.21 (-0.31, -0.12)</b> | 97.5                 |
| Potter 1987                                          | <b>-0.20 (-0.30, -0.10)</b> | 97.6                 |
| Sharif & Sargent 2006 (Weekday)                      | <b>-0.20 (-0.30, -0.10)</b> | 97.4                 |
| Sharif & Sargent 2006 (Weekend day)                  | <b>-0.20 (-0.30, -0.10)</b> | 97.5                 |
| Sharma et al 2017                                    | <b>-0.19 (-0.29, -0.08)</b> | 97.7                 |
| Shejwal & Purayidathil 2006 (Boys)                   | <b>-0.17 (-0.27, -0.07)</b> | 97.6                 |
| Shejwal & Purayidathil 2006 (Girls)                  | <b>-0.16 (-0.26, -0.07)</b> | 97.6                 |
| Vassiloudis et al 2014                               | <b>-0.17 (-0.27, -0.07)</b> | 97.6                 |
| Walberg & Weinstein 1982                             | <b>-0.19 (-0.29, -0.09)</b> | 97.7                 |

|                                                                                                                                                                                                                              |                             |      |
|------------------------------------------------------------------------------------------------------------------------------------------------------------------------------------------------------------------------------|-----------------------------|------|
| Welch et al 1986                                                                                                                                                                                                             | <b>-0.19 (-0.29, -0.10)</b> | 97.7 |
| <b>TV viewing – language</b>                                                                                                                                                                                                 |                             |      |
| Adelantado-Renau et al 2019                                                                                                                                                                                                  | -0.18 (-0.37, 0.01)         | 96.1 |
| Fetler 1984                                                                                                                                                                                                                  | -0.20 (-0.43, 0.04)         | 94.9 |
| Peirce 1983                                                                                                                                                                                                                  | -0.13 (-0.31, 0.05)         | 95.8 |
| Potter 1987                                                                                                                                                                                                                  | -0.21 (-0.41, 0.00)         | 96.1 |
| Ribner et al 2017                                                                                                                                                                                                            | -0.17 (-0.37, 0.03)         | 95.9 |
| Ridley-Johnson et al 1983                                                                                                                                                                                                    | -0.17 (-0.37, 0.02)         | 96.1 |
| Shin 2004                                                                                                                                                                                                                    | -0.19 (-0.39, 0.02)         | 96.0 |
| Walberg & Tsai 1984                                                                                                                                                                                                          | <b>-0.22 (-0.30, -0.14)</b> | 61.1 |
| <b>TV viewing – mathematics</b>                                                                                                                                                                                              |                             |      |
| Adelantado-Renau et al 2019                                                                                                                                                                                                  | <b>-0.27 (-0.36, -0.18)</b> | 69.8 |
| Fetler 1984                                                                                                                                                                                                                  | <b>-0.25 (-0.38, -0.12)</b> | 74.4 |
| Potter 1987                                                                                                                                                                                                                  | <b>-0.26 (-0.36, -0.16)</b> | 74.7 |
| Ribner et al 2017                                                                                                                                                                                                            | <b>-0.22 (-0.25, -0.18)</b> | 0.0  |
| Ridley-Johnson et al 1983                                                                                                                                                                                                    | <b>-0.24 (-0.34, -0.15)</b> | 75.4 |
| Shejwal & Purayidathil 2006 (Boys)                                                                                                                                                                                           | <b>-0.24 (-0.34, -0.15)</b> | 75.4 |
| Shin 2004                                                                                                                                                                                                                    | <b>-0.25 (-0.37, -0.13)</b> | 75.5 |
| <b>Video games playing – composite scores</b>                                                                                                                                                                                |                             |      |
| Adelantado-Renau et al 2019                                                                                                                                                                                                  | <b>-0.15 (-0.22, -0.07)</b> | 66.7 |
| Ferguson 2011                                                                                                                                                                                                                | <b>-0.16 (-0.23, -0.08)</b> | 67.1 |
| Hastings et al 2009                                                                                                                                                                                                          | <b>-0.15 (-0.22, -0.08)</b> | 67.0 |
| Jeong & Kim 2011                                                                                                                                                                                                             | <b>-0.13 (-0.20, -0.06)</b> | 57.0 |
| Kiatrungrit & Hongsanguansri 2014                                                                                                                                                                                            | <b>-0.14 (-0.22, -0.07)</b> | 65.2 |
| Leng et al 2009                                                                                                                                                                                                              | <b>-0.12 (-0.18, -0.06)</b> | 46.3 |
| Sharif & Sargent 2006 (Weekday)                                                                                                                                                                                              | <b>-0.17 (-0.25, -0.09)</b> | 58.4 |
| Sharif & Sargent 2006 (Weekend day)                                                                                                                                                                                          | <b>-0.16 (-0.26, -0.07)</b> | 66.9 |
| Van Schie and Wiegman 1997                                                                                                                                                                                                   | <b>-0.17 (-0.24, -0.10)</b> | 60.8 |
| Vassiloudis et al 2014                                                                                                                                                                                                       | <b>-0.14 (-0.22, -0.07)</b> | 65.5 |
| Statistically significant values are shown in bold.<br>ES: effect size; CI: confidence intervals; I <sup>2</sup> : heterogeneity; TV: television; Screen media indicates a composite measure of 2 or more screen activities. |                             |      |

**eFigure.** Funnel Plots Assessing Publication Bias for Studies Analysing the Association of A) Overall Screen Media, B) Television Viewing, and C) Video Games Playing, With Academic Performance Areas

A

Composite scores

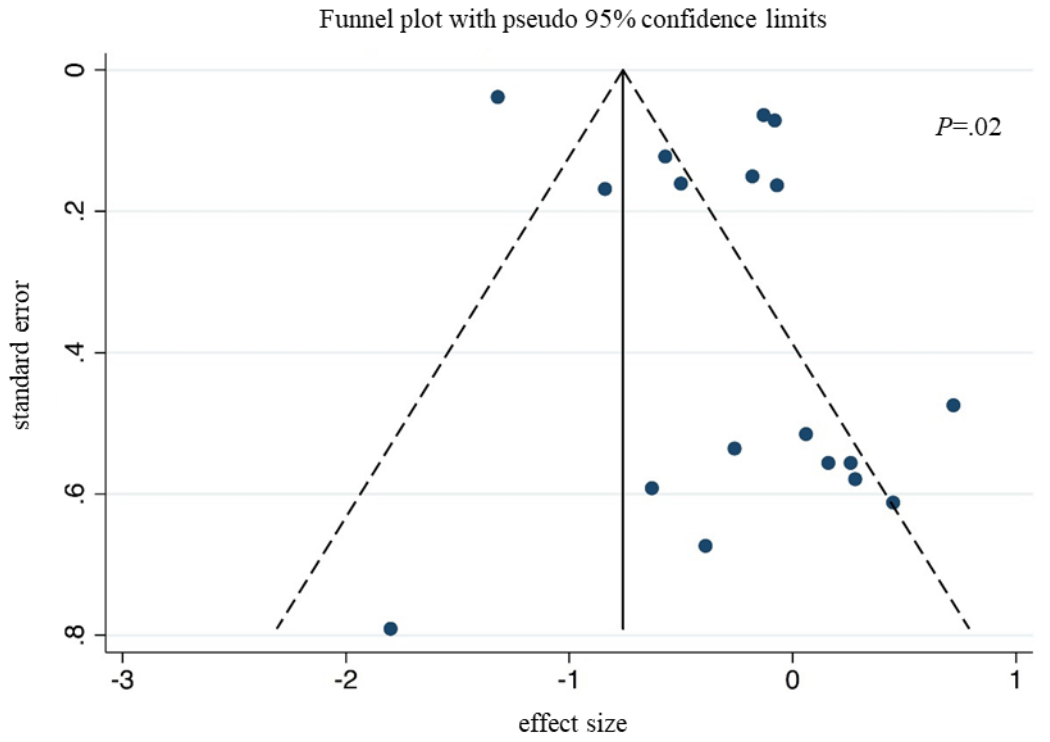

**B**

Composite scores

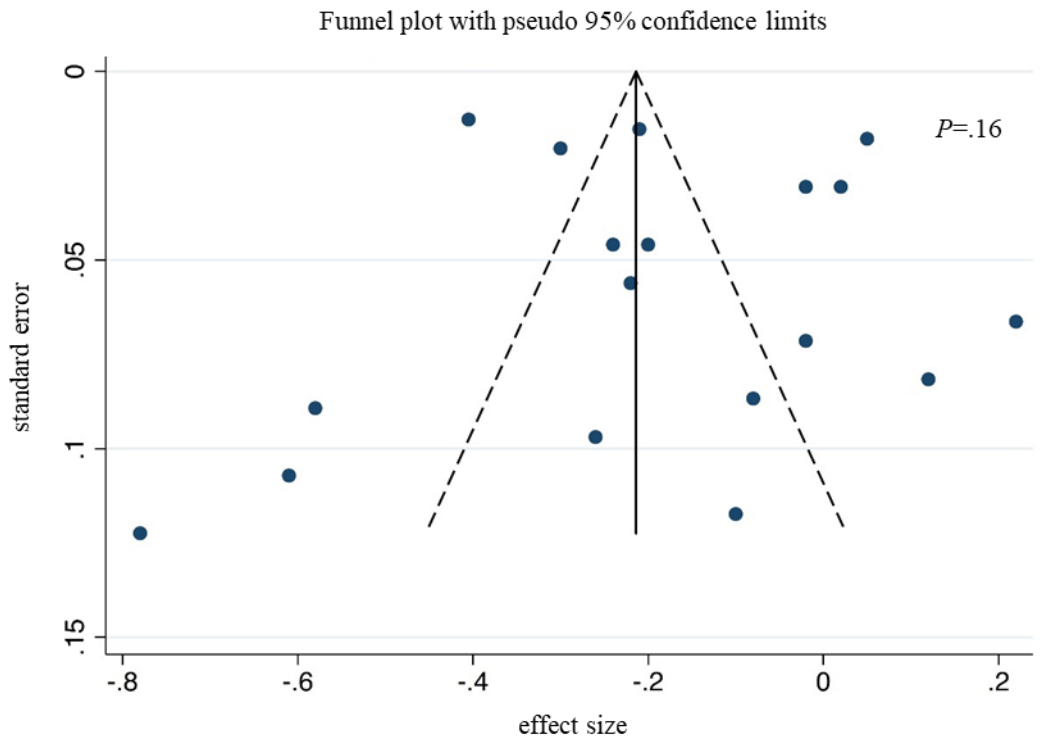

Language

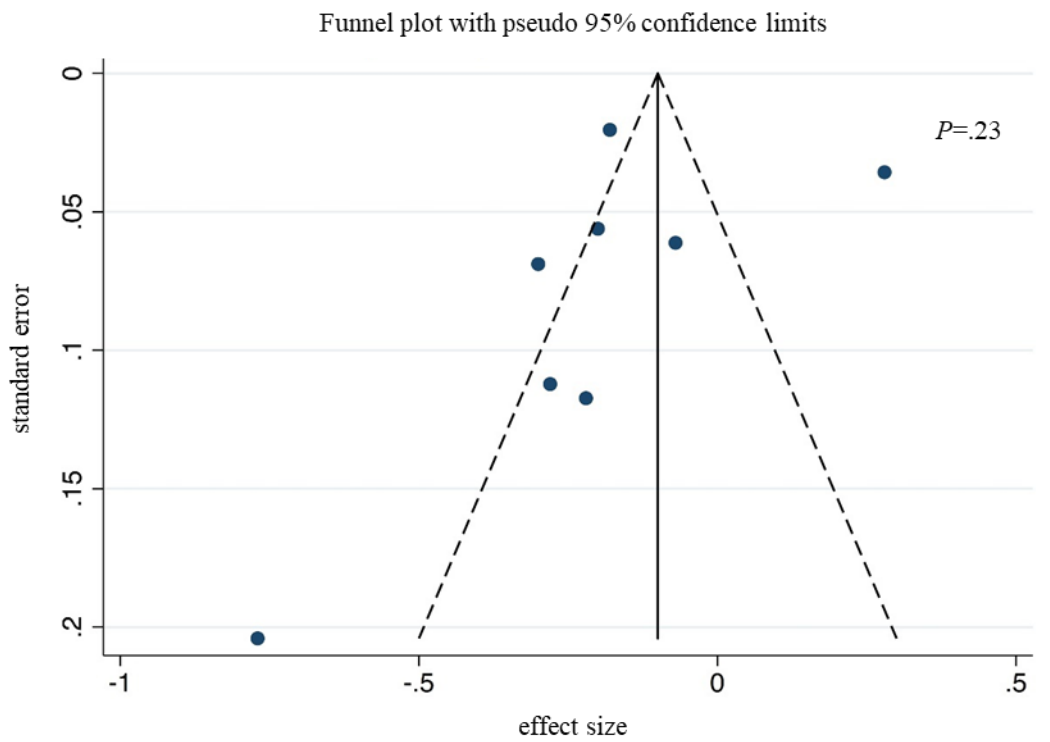

Mathematics

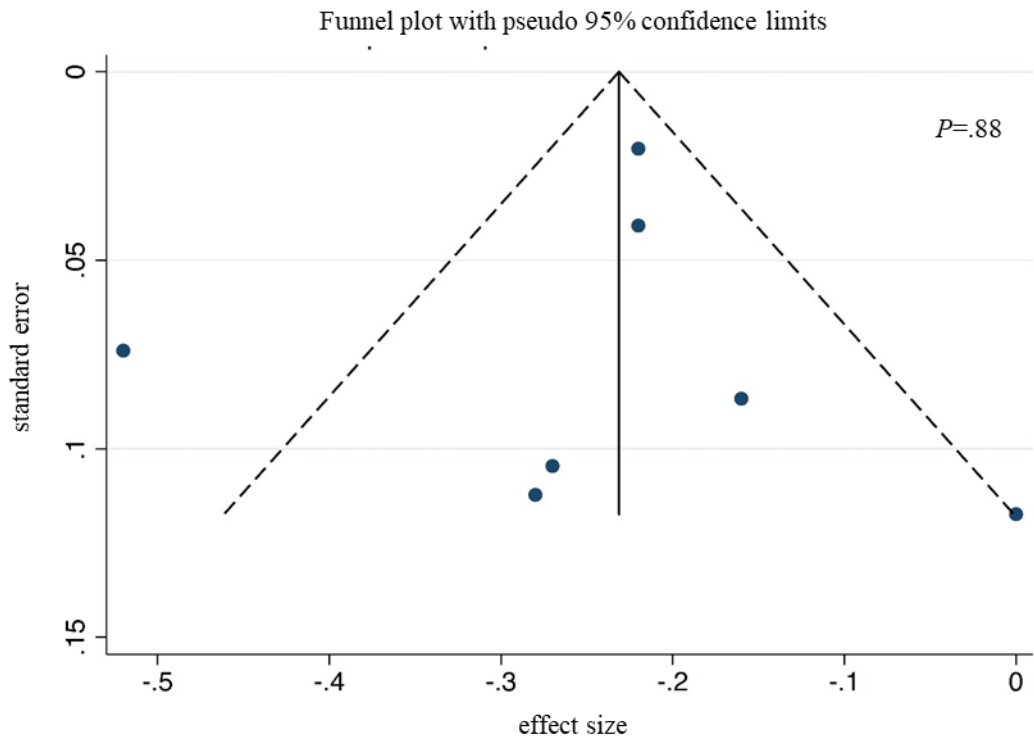

C

Composite scores

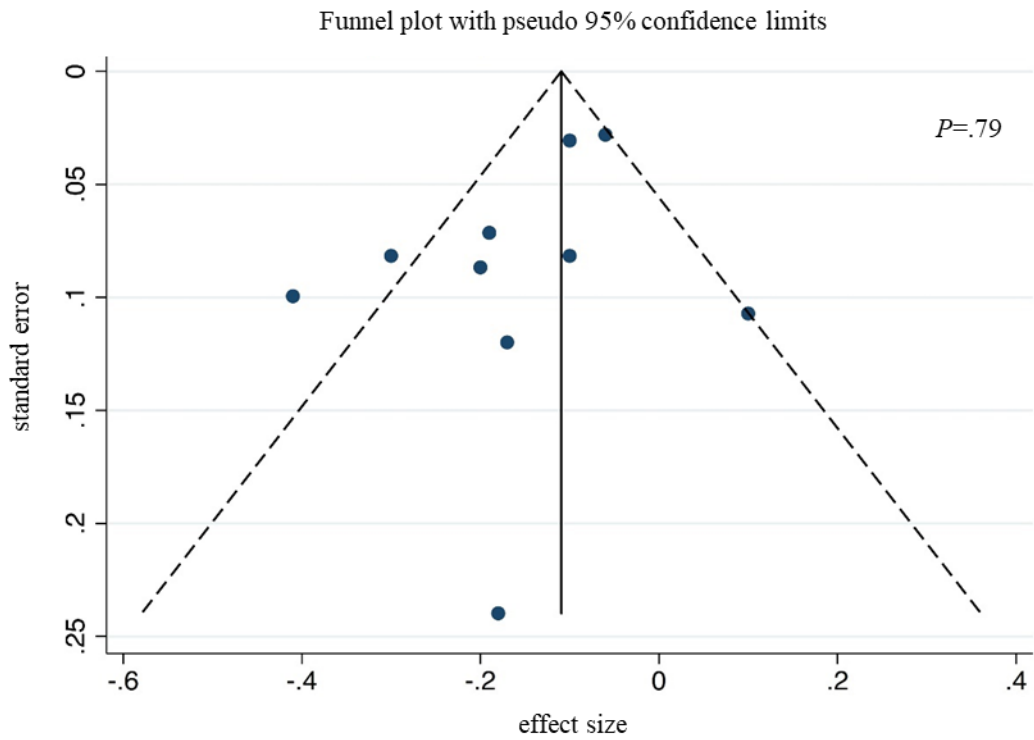

Supplement: jamapediatr-173-1058-s001.pdf [file jamapediatr-173-1058-s001.pdf]
